# Supplementary material for: Well-Defined Ultrasmall V-NiP2 Nanoparticles Anchored g-C3N4 Nanosheets as Highly Efficient Visible-Light-Driven Photocatalysts for H2 Evolution
Source: MDPI journal article supplement (doi:10.3390/catal12090998), 2022-09-05
Supplement: s1 [file s1]

# Supplementary Material

## Well-Defined Ultrasmall V-NiP<sub>2</sub> Nanoparticles Anchored g-C<sub>3</sub>N<sub>4</sub> Nanosheets as Highly Efficient Visible-Light-Driven Photocatalysts for H<sub>2</sub> Evolution

Mengfan Niu <sup>1,2</sup>, Liyun Cao <sup>1,2,\*</sup>, Qianqian Liu <sup>3</sup>, Xiaoyi Li <sup>1,2</sup>, Qian Chen <sup>1,2</sup>, Dinghan Liu <sup>4</sup>, Wenbin Li <sup>1</sup>, Jianfeng Huang <sup>1,2,\*</sup> and Liangliang Feng <sup>1,2,\*</sup>

<sup>1</sup> Key Laboratory of Auxiliary Chemistry and Technology for Chemical Industry, Ministry of Education, Shaanxi University of Science and Technology, Xi'an 710021, China

<sup>2</sup> School of Materials Science and Engineering, Shaanxi University of Science and Technology, Xi'an 710021, China;

<sup>3</sup> School of Materials Science and Engineering, Xi'an University of Science and Technology, Xi'an 710021, China

<sup>4</sup> School of Electronic Information and Artificial Intelligence, Shaanxi University of Science and Technology, Xi'an 710021, China

\* Correspondence: caoliyun@sust.edu.cn (L.C.); huangjf@sust.edu.cn (J.H.); fengll@sust.edu.cn (L.F.)

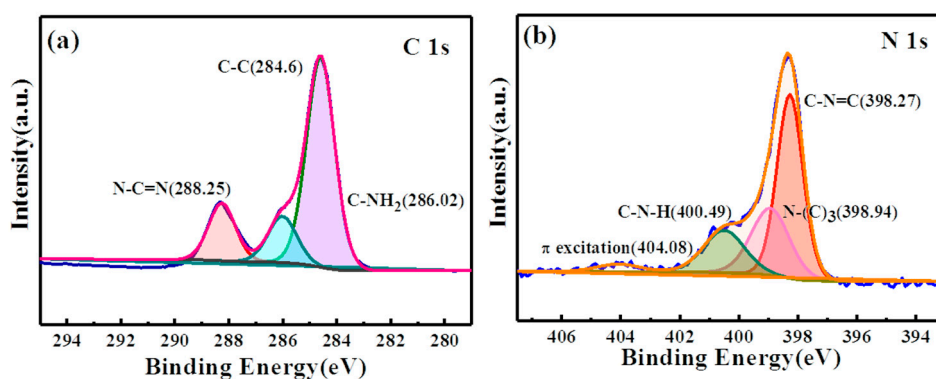

Figure S1. The XPS spectra of (a) C 1s, (b) N 1s for V-NiP<sub>2</sub>/g-C<sub>3</sub>N<sub>4</sub>.

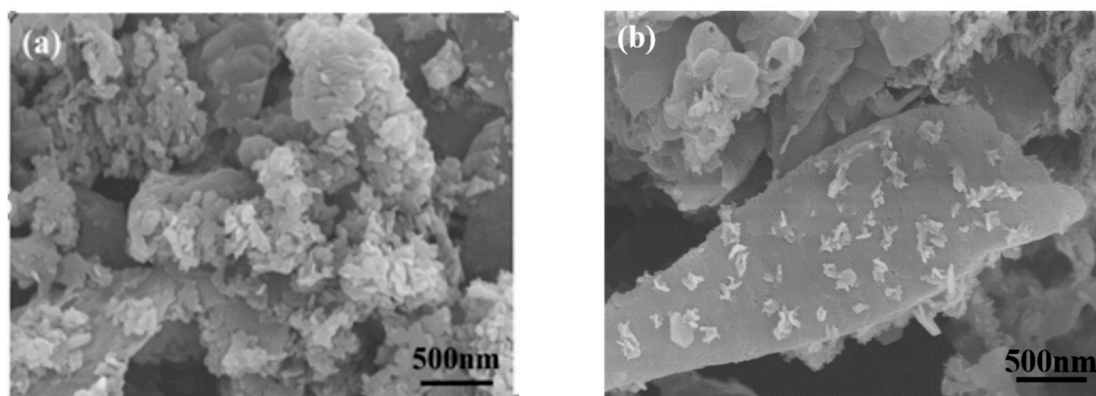

Figure S2. SEM of (a) g-C<sub>3</sub>N<sub>4</sub>, (b) V-NiP<sub>2</sub>/g-C<sub>3</sub>N<sub>4</sub>

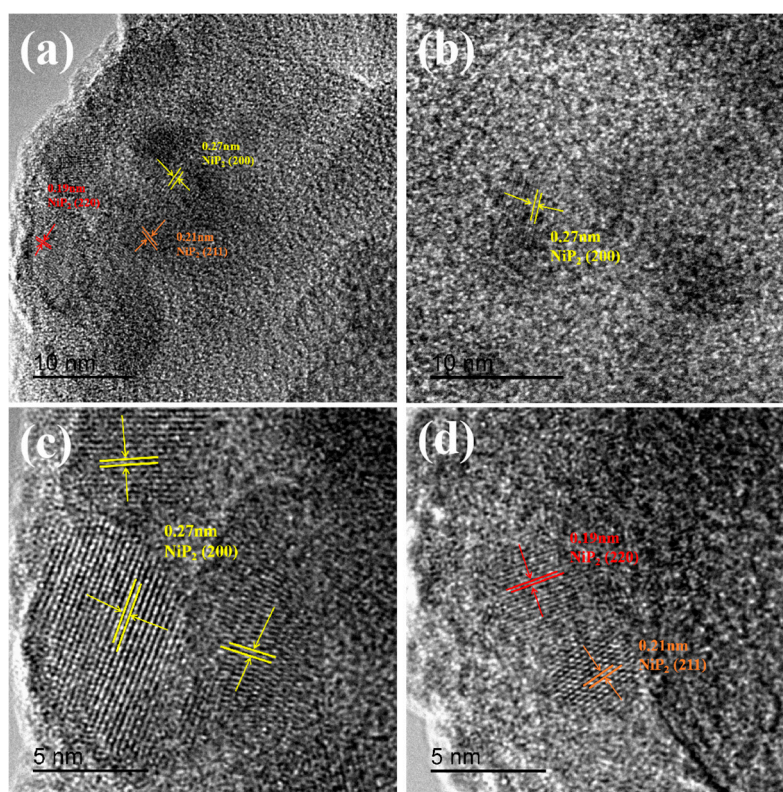

Figure S3. HRTEM of V-NiP<sub>2</sub>/g-C<sub>3</sub>N<sub>4</sub>

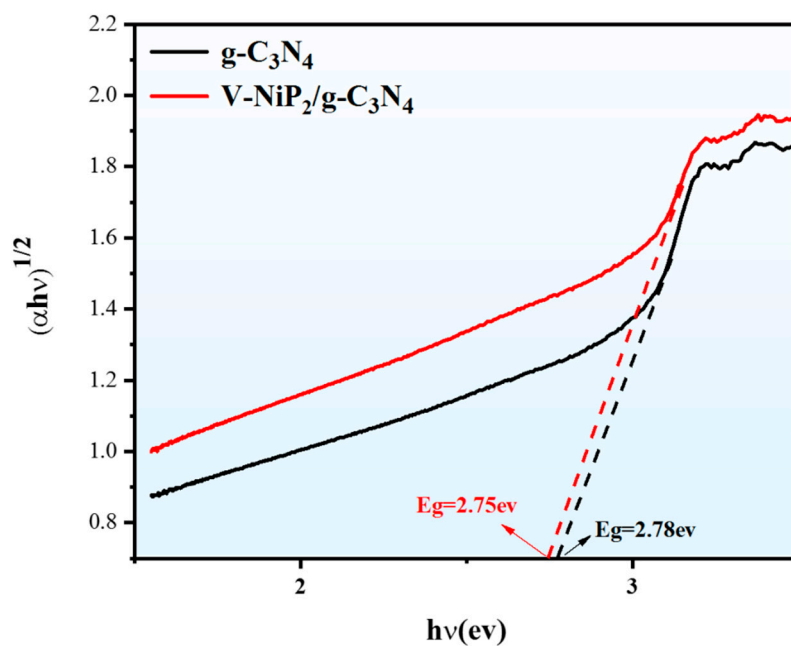

Figure S4. The banding energy of pure g-C<sub>3</sub>N<sub>4</sub> and V-NiP<sub>2</sub>/g-C<sub>3</sub>N<sub>4</sub>

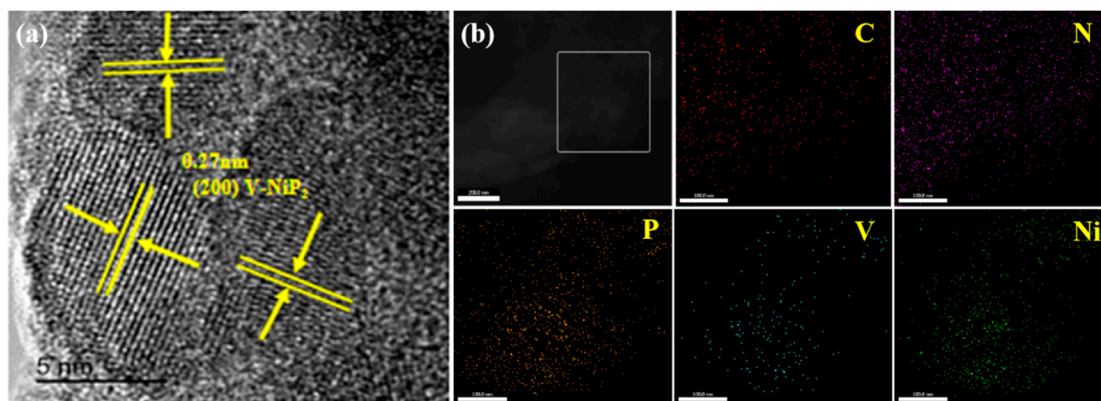

Figure S5. HRTEM and elemental mapping of V-NiP<sub>2</sub>/g-C<sub>3</sub>N<sub>4</sub> after test

Table S1. Summary of the Photocatalytic H<sub>2</sub> Evolution on g-C<sub>3</sub>N<sub>4</sub>-Based Photocatalysts

| photocatalysts                  | Co-catalysts       | Light Source | Activity<br>( $\mu\text{mol h}^{-1} \text{g}^{-1}$ ) | reference |
|---------------------------------|--------------------|--------------|------------------------------------------------------|-----------|
| g-C <sub>3</sub> N <sub>4</sub> | V-NiP <sub>2</sub> | 300 W        | 356.7                                                | This work |
| g-C <sub>3</sub> N <sub>4</sub> | Co <sub>2</sub> P  | 300 W        | 128.4                                                | 23        |

|                                 |                   |       |       |    |
|---------------------------------|-------------------|-------|-------|----|
| g-C <sub>3</sub> N <sub>4</sub> | FeP               | 300 W | 177.9 | 26 |
| g-C <sub>3</sub> N <sub>4</sub> | MoP               | 300 W | 327.5 | 27 |
| g-C <sub>3</sub> N <sub>4</sub> | NiP <sub>2</sub>  | 300 W | 105   | 30 |
| g-C <sub>3</sub> N <sub>4</sub> | Ni <sub>2</sub> P | 300 W | 5.67  | 36 |
| g-C <sub>3</sub> N <sub>4</sub> | RP                | 300 W | 2110  | 37 |
| g-C <sub>3</sub> N <sub>4</sub> | Ni                | 500 W | 168.2 | 38 |
| g-C <sub>3</sub> N <sub>4</sub> | NiS               | 150 W | 84    | 39 |
